# Supplementary material for: Phase control of quasi-2D perovskite thin films by adding MAPbI3 in the precursor solution
Source: Royal Society of Chemistry journal article supplement (doi:10.1039/d2dt00966h), 2022-01-01
Supplement: d2dt00966h1.pdf [file d2dt00966h1.pdf]

## Supporting Information

### Phase control of quasi-2D perovskite thin films by adding 3D

#### MAPbI<sub>3</sub> in precursor solution

Meng Wang,<sup>a,b</sup> Jiayu You,<sup>b</sup> Cunyun Xu,<sup>b</sup> Jun Dong,<sup>b,c</sup> Chuanyao Luo,<sup>a,b</sup> Qunliang Song<sup>\*b</sup> and Sam Zhang,<sup>\*a,b</sup>

- a. Centre for Advanced Thin Films Materials and Devices, Southwest University, Chongqing 400715, P. R. China.
- b. Institute for Clean Energy and Advanced Materials, School of Materials and Energy, Southwest University, Chongqing 400715, P. R. China.
- c. Key Laboratory of Extraordinary Bond Engineering and Advance Materials Technology (EBEAM) of Chongqing, Yangtze Normal University, Chongqing 408100, P. R. China

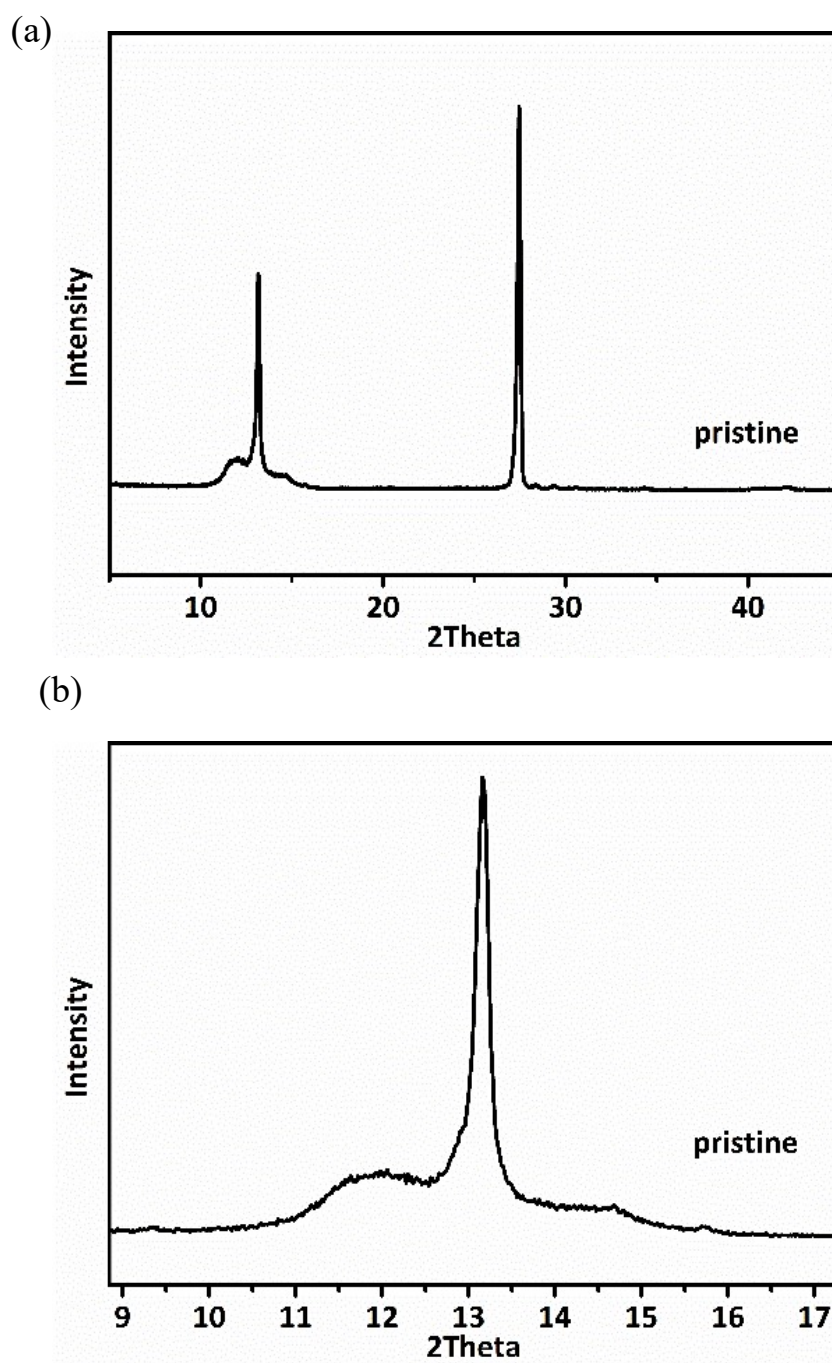

**Figure. S1.** (a) The XRD patterns of pristine ACI perovskite films and (b) partial enlarged XRD patterns of pristine ACI perovskite films

(a)

(b)

(c)

**Figure. S2.** The amplified SEM images of (a) pristine ACI film, (b) ACI film with 0.1 M 3D MAPbI<sub>3</sub> added, (c) ACI film with 0.1 M MAI+PbI<sub>2</sub>. The scale bar is 100 nm.

**Table S1.** Fitted parameters for the TRPL decay traces of ACI perovskite films with different amounts of 3D MAPbI<sub>3</sub> added in precursor.

| Amount of 3D additions (M) | Average lifetime (ns) | $\tau_1$ (ns) | $\tau_2$ (ns) |
|----------------------------|-----------------------|---------------|---------------|
| 0                          | 242.23                | 95.22         | 427.83        |
| 0.05                       | 266.24                | 116.16        | 535.03        |
| 0.1                        | 343.98                | 146.66        | 992.27        |
| 0.35                       | 31.97                 | 14.97         | 184.93        |

**Table S2.** Summary of the photovoltaic parameters of the p-i-n structure perovskite solar cells with different amounts of 3D MAPbI<sub>3</sub> addition.

| Amount of 3D additions (M) | V <sub>oc</sub> (V) | J <sub>sc</sub> (mA•cm <sup>-2</sup> ) | FF (%) | PCE (%) |
|----------------------------|---------------------|----------------------------------------|--------|---------|
| 0                          | 0.975               | 15.33                                  | 69.56  | 10.40   |
| 0.05                       | 1.005               | 15.77                                  | 73.21  | 11.61   |
| 0.1                        | 1.032               | 17.31                                  | 77.38  | 13.82   |
| 0.35                       | 0.951               | 16.95                                  | 73.53  | 11.85   |
